# Supplementary material for: Low Long Terminal Repeat (LTR)-Retrotransposon Expression in Leaves of the Marine Phanerogam Posidonia Oceanica L
Source: Life (Basel). 2020 Mar 24;10(3):30. doi: 10.3390/life10030030 (PMC7151569; doi:10.3390/life10030030)
Supplement: Supplementary file 1 [file life-10-00030-s001.xlsx]

## Sheet: supplementary material
Suppl. file #1: RNA-seq analysis of expression of 180 LTR-RE fragments in control and heat-treated shallow and deep plants of Posidonia oceanica
Feature ID	Deep-SRR5043760 Total gene reads	Deep-SRR5043763 Total gene reads	Deep-SRR5043765 Total gene reads	Deep-SRR5043766 Total gene reads	Deep-SRR5043775 Total gene reads	Deep-SRR5043781 Total gene reads	Shallow-SRR5043759 Total gene reads	Shallow-SRR5043767 Total gene reads	Shallow-SRR5043774 Total gene reads	Shallow-SRR5043776 Total gene reads	Shallow-SRR5043777 Total gene reads	Shallow-SRR5043778 Total gene reads	Deep Exposure-SRR5043758 Total gene reads	Deep Exposure-SRR5043764 Total gene reads	Deep Exposure-SRR5043770 Total gene reads	Deep Exposure-SRR5043772 Total gene reads	Deep Exposure-SRR5043779 Total gene reads	Deep Exposure-SRR5043773 Total gene reads	Shallow Exposure-SRR5043761 Total gene reads	Shallow Exposure-SRR5043762 Total gene reads	Shallow Exposure-SRR5043768 Total gene reads	Shallow Exposure-SRR5043769 Total gene reads	Shallow Exposure-SRR5043771 Total gene reads	Shallow Exposure-SRR5043780 Total gene reads	Deep-SRR5043760 Mapped reads per million	Deep-SRR5043763 Mapped reads per million	Deep-SRR5043765 Mapped reads per million	Deep-SRR5043766 Mapped reads per million	Deep-SRR5043775 Mapped reads per million	Deep-SRR5043781 Mapped reads per million	Shallow-SRR5043759 Mapped reads per million	Shallow-SRR5043767 Mapped reads per million	Shallow-SRR5043774 Mapped reads per million	Shallow-SRR5043776 Mapped reads per million	Shallow-SRR5043777 Mapped reads per million	Shallow-SRR5043778 Mapped reads per million	Deep Exposure-SRR5043758 Mapped reads per million	Deep Exposure-SRR5043764 Mapped reads per million	Deep Exposure-SRR5043770 Mapped reads per million	Deep Exposure-SRR5043772 Mapped reads per million	Deep Exposure-SRR5043779 Mapped reads per million	Deep Exposure-SRR5043773 Mapped reads per million	Shallow Exposure-SRR5043761 Mapped reads per million	Shallow Exposure-SRR5043762 Mapped reads per million	Shallow Exposure-SRR5043768 Mapped reads per million	Shallow Exposure-SRR5043769 Mapped reads per million	Shallow Exposure-SRR5043771 Mapped reads per million	Shallow Exposure-SRR5043780 Mapped reads per million	Deep Mapped reads per million mean
Poc_contig_10051	5	1	3	1	1	1	0	2	1	1	0	2	0	0	4	3	3	0	1	2	1	0	0	2	0.223451	0.050382	0.1431	0.0469419	0.0509421	0.0417713	0	0.0905428	0.0438645	0.0513423	0	0.099786	0	0	0.19356	0.138842	0.139538	0	0.045899	0.100058	0.0443108	0	0	0.101379	0.0927647
Poc_contig_10183	19	11	13	11	6	6	14	12	29	14	11	23	13	5	28	13	22	4	6	10	6	11	10	15	0.849115	0.554202	0.620098	0.516361	0.305653	0.250628	0.600174	0.543257	1.27207	0.718793	0.497617	1.14754	0.61586	0.244707	1.35492	0.601648	1.02328	0.17727	0.275394	0.500289	0.265865	0.553298	0.491501	0.760344	0.51601
Poc_contig_10207	109	65	97	69	39	42	55	102	111	54	75	72	62	94	138	107	79	47	69	111	75	62	68	72	4.87124	3.27483	4.62689	3.23899	1.98674	1.7544	2.35783	4.61768	4.86896	2.77249	3.39284	3.59229	2.93718	4.60049	6.67783	4.95203	3.67449	2.08292	3.16703	5.5532	3.32331	3.11859	3.34221	3.64965	3.29218
Poc_contig_10239	375	316	398	395	184	192	211	513	538	206	347	421	320	255	467	345	396	176	368	382	378	313	243	297	16.7589	15.9207	18.9845	18.542	9.37335	8.02009	9.04548	23.2242	23.5991	10.5765	15.6976	21.0049	15.1596	12.4801	22.5982	15.9668	18.419	7.79986	16.8908	19.111	16.7495	15.7438	11.9435	15.0548	14.5999
Poc_contig_10292	0	0	0	0	0	0	0	0	0	0	0	0	0	0	0	0	0	0	0	0	0	0	0	0	0	0	0	0	0	0	0	0	0	0	0	0	0	0	0	0	0	0	0	0	0	0	0	0	0
Poc_contig_10403	15	11	17	18	6	8	6	14	24	12	19	7	10	15	29	9	10	6	7	12	9	13	6	14	0.670354	0.554202	0.810898	0.844954	0.305653	0.33417	0.257217	0.633799	1.05275	0.616108	0.85952	0.349251	0.473738	0.734121	1.40331	0.416526	0.465125	0.265904	0.321293	0.600346	0.398797	0.653897	0.294901	0.709654	0.586705
Poc_contig_10486	0	0	0	0	0	0	0	0	0	0	0	0	0	0	0	0	0	0	0	0	0	0	0	0	0	0	0	0	0	0	0	0	0	0	0	0	0	0	0	0	0	0	0	0	0	0	0	0	0
Poc_contig_10534	16	7	6	9	4	4	8	13	10	2	11	8	8	2	14	4	11	5	6	6	4	5	6	9	0.715045	0.352674	0.286199	0.422477	0.203768	0.167085	0.342957	0.588528	0.438645	0.102685	0.497617	0.399144	0.378991	0.0978828	0.677461	0.185123	0.511638	0.221587	0.275394	0.300173	0.177243	0.251499	0.294901	0.456206	0.357875
Poc_contig_10722	0	0	0	0	0	0	0	0	0	0	0	0	0	0	0	0	0	0	0	0	0	0	0	0	0	0	0	0	0	0	0	0	0	0	0	0	0	0	0	0	0	0	0	0	0	0	0	0	0
Poc_contig_10943	0	0	0	0	0	2	2	0	2	0	0	0	0	0	0	0	0	0	1	0	0	0	2	0	0	0	0	0	0	0.0835426	0.0857391	0	0.087729	0	0	0	0	0	0	0	0	0	0.045899	0	0	0	0.0983002	0	0.0139238
Poc_contig_10998	0	0	0	0	0	0	0	0	0	0	0	0	0	0	0	0	0	0	0	0	0	0	0	0	0	0	0	0	0	0	0	0	0	0	0	0	0	0	0	0	0	0	0	0	0	0	0	0	0
Poc_contig_11112	0	0	1	2	0	0	2	2	2	0	3	1	0	0	1	3	0	0	0	0	1	0	0	0	0	0	0.0476999	0.0938837	0	0	0.0857391	0.0905428	0.087729	0	0.135714	0.049893	0	0	0.0483901	0.138842	0	0	0	0	0.0443108	0	0	0	0.0235973
Poc_contig_11126	0	0	0	0	0	0	0	0	0	0	0	0	0	0	0	0	0	0	0	0	0	0	0	0	0	0	0	0	0	0	0	0	0	0	0	0	0	0	0	0	0	0	0	0	0	0	0	0	0
Poc_contig_11178	0	0	0	0	0	0	0	0	0	0	0	0	0	0	0	0	0	0	0	0	0	0	0	0	0	0	0	0	0	0	0	0	0	0	0	0	0	0	0	0	0	0	0	0	0	0	0	0	0
Poc_contig_1135	16	6	9	9	4	8	5	14	11	5	5	9	11	5	12	11	10	5	9	19	7	13	8	11	0.715045	0.302292	0.429299	0.422477	0.203768	0.33417	0.214348	0.633799	0.48251	0.256712	0.22619	0.449037	0.521112	0.244707	0.580681	0.509087	0.465125	0.221587	0.413091	0.950548	0.310175	0.653897	0.393201	0.557585	0.401175
Poc_contig_11455	0	0	0	0	0	0	0	0	0	0	0	0	0	0	0	0	0	0	0	0	0	0	0	0	0	0	0	0	0	0	0	0	0	0	0	0	0	0	0	0	0	0	0	0	0	0	0	0	0
Poc_contig_11641	34	17	23	29	15	10	24	29	25	13	26	13	11	14	22	17	12	13	20	12	18	12	13	19	1.51947	0.856494	1.0971	1.36131	0.764132	0.417713	1.02887	1.31287	1.09661	0.66745	1.17619	0.648609	0.521112	0.68518	1.06458	0.786771	0.55815	0.576126	0.91798	0.600346	0.797594	0.603597	0.638951	0.963102	1.0027
Poc_contig_11844	0	1	2	0	0	0	0	0	0	1	1	1	0	4	2	0	2	1	0	0	0	0	2	1	0	0.050382	0.0953997	0	0	0	0	0	0	0.0513423	0.0452379	0.049893	0	0.195766	0.0967801	0	0.093025	0.0443174	0	0	0	0	0.0983002	0.0506896	0.024297
Poc_contig_11919	38	14	33	33	6	12	17	40	37	14	16	28	25	25	39	31	22	22	22	28	32	20	34	13	1.69823	0.705348	1.5741	1.54908	0.305653	0.501256	0.728783	1.81086	1.62299	0.718793	0.723806	1.397	1.18435	1.22354	1.88721	1.4347	1.02328	0.974982	1.00978	1.40081	1.41794	1.006	1.6711	0.658965	1.05561
Poc_contig_11947	71	37	48	66	32	45	33	63	94	44	57	67	49	38	117	60	44	38	65	57	52	35	34	42	3.17301	1.86413	2.28959	3.09816	1.63015	1.87971	1.4147	2.8521	4.12327	2.25906	2.57856	3.34283	2.32132	1.85977	5.66164	2.77684	2.04655	1.68406	2.98343	2.85164	2.30416	1.76049	1.6711	2.12896	2.32246
Poc_contig_11953	77	54	46	60	41	31	39	85	74	34	49	52	52	60	88	76	57	35	64	85	55	38	65	48	3.44115	2.72063	2.19419	2.81651	2.08863	1.29491	1.67191	3.84807	3.24597	1.74564	2.21666	2.59443	2.46344	2.93648	4.25833	3.51733	2.65121	1.55111	2.93754	4.25245	2.43709	1.91139	3.19476	2.4331	2.426
Poc_contig_12102	0	0	0	0	0	0	0	0	0	0	0	0	0	0	0	0	0	0	0	0	0	0	0	0	0	0	0	0	0	0	0	0	0	0	0	0	0	0	0	0	0	0	0	0	0	0	0	0	0
Poc_contig_12140	26	18	28	30	15	15	6	45	33	12	24	17	16	19	40	21	32	19	18	24	12	23	21	12	1.16195	0.906876	1.3356	1.40826	0.764132	0.62657	0.257217	2.03721	1.44753	0.616108	1.08571	0.848181	0.757981	0.929887	1.9356	0.971893	1.4884	0.84203	0.826182	1.20069	0.531729	1.15689	1.03215	0.608275	1.0339
Poc_contig_12159	7	0	1	8	8	0	1	4	2	3	11	0	8	0	0	0	2	2	0	0	2	3	0	7	0.312832	0	0.0476999	0.375535	0.407537	0	0.0428696	0.181086	0.087729	0.154027	0.497617	0	0.378991	0	0	0	0.093025	0.0886348	0	0	0.0886216	0.150899	0	0.354827	0.190601
Poc_contig_12161	2	1	2	2	2	2	2	6	4	0	5	4	7	6	7	12	3	4	3	12	6	2	4	3	0.0893806	0.050382	0.0953997	0.0938837	0.101884	0.0835426	0.0857391	0.271628	0.175458	0	0.22619	0.199572	0.331617	0.293648	0.33873	0.555368	0.139538	0.17727	0.137697	0.600346	0.265865	0.1006	0.1966	0.152069	0.0857455
Poc_contig_12172	0	0	0	0	0	0	0	0	0	0	0	0	0	0	0	0	0	0	0	0	0	0	0	0	0	0	0	0	0	0	0	0	0	0	0	0	0	0	0	0	0	0	0	0	0	0	0	0	0
Poc_contig_12204	0	0	0	0	0	0	0	0	0	0	0	0	0	0	0	0	0	0	0	0	0	0	0	0	0	0	0	0	0	0	0	0	0	0	0	0	0	0	0	0	0	0	0	0	0	0	0	0	0
Poc_contig_12304	2	3	1	3	4	1	6	1	3	2	7	1	5	2	1	2	0	0	1	5	1	1	0	3	0.0893806	0.151146	0.0476999	0.140826	0.203768	0.0417713	0.257217	0.0452714	0.131594	0.102685	0.316665	0.049893	0.236869	0.0978828	0.0483901	0.0925613	0	0	0.045899	0.250144	0.0443108	0.0502998	0	0.152069	0.112432
Poc_contig_12344	0	0	0	0	0	0	0	0	0	0	0	0	0	0	0	0	0	0	0	0	0	0	0	0	0	0	0	0	0	0	0	0	0	0	0	0	0	0	0	0	0	0	0	0	0	0	0	0	0
Poc_contig_12345	0	0	0	0	0	0	0	0	0	0	0	0	0	0	0	0	0	0	0	0	0	0	0	0	0	0	0	0	0	0	0	0	0	0	0	0	0	0	0	0	0	0	0	0	0	0	0	0	0
Poc_contig_12367	2	0	3	1	0	0	0	1	1	0	2	1	0	2	2	1	1	1	3	2	0	0	1	1	0.0893806	0	0.1431	0.0469419	0	0	0	0.0452714	0.0438645	0	0.0904758	0.049893	0	0.0978828	0.0967801	0.0462806	0.0465125	0.0443174	0.137697	0.100058	0	0	0.0491501	0.0506896	0.0465703
Poc_contig_1237	12	7	4	6	4	3	9	9	13	8	8	11	4	8	17	11	11	5	10	9	5	1	4	5	0.536283	0.352674	0.190799	0.281651	0.203768	0.125314	0.385826	0.407442	0.570239	0.410739	0.361903	0.548823	0.189495	0.391531	0.822631	0.509087	0.511638	0.221587	0.45899	0.45026	0.221554	0.0502998	0.1966	0.253448	0.281748
Poc_contig_12409	0	0	0	0	0	0	0	0	0	0	0	0	0	0	0	0	0	0	0	0	0	0	0	0	0	0	0	0	0	0	0	0	0	0	0	0	0	0	0	0	0	0	0	0	0	0	0	0	0
Poc_contig_12414	11	3	4	7	5	3	5	11	8	2	10	3	5	3	4	3	3	0	2	9	5	3	0	5	0.491593	0.151146	0.190799	0.328593	0.254711	0.125314	0.214348	0.497985	0.350916	0.102685	0.452379	0.149679	0.236869	0.146824	0.19356	0.138842	0.139538	0	0.091798	0.45026	0.221554	0.150899	0	0.253448	0.257026
Poc_contig_12455	15	8	11	7	1	4	0	7	19	3	2	11	9	8	11	18	9	8	13	4	21	8	10	7	0.670354	0.403056	0.524699	0.328593	0.0509421	0.167085	0	0.3169	0.833426	0.154027	0.0904758	0.548823	0.426365	0.391531	0.532291	0.833051	0.418613	0.354539	0.596687	0.200115	0.930526	0.402398	0.491501	0.354827	0.357455
Poc_contig_12475	0	0	0	0	0	0	0	0	0	0	0	0	0	0	0	0	0	0	0	0	0	0	0	0	0	0	0	0	0	0	0	0	0	0	0	0	0	0	0	0	0	0	0	0	0	0	0	0	0
Poc_contig_12567	3	1	8	7	0	1	5	0	4	5	4	0	0	4	2	2	1	0	5	2	3	1	0	1	0.134071	0.050382	0.381599	0.328593	0	0.0417713	0.214348	0	0.175458	0.256712	0.180952	0	0	0.195766	0.0967801	0.0925613	0.0465125	0	0.229495	0.100058	0.132932	0.0502998	0	0.0506896	0.156069
Poc_contig_12827	0	0	0	0	0	0	0	0	0	0	0	0	0	0	0	0	0	0	0	0	0	0	0	0	0	0	0	0	0	0	0	0	0	0	0	0	0	0	0	0	0	0	0	0	0	0	0	0	0
Poc_contig_12965	0	0	0	0	0	0	0	0	0	0	0	0	0	0	0	0	0	0	0	0	0	0	0	0	0	0	0	0	0	0	0	0	0	0	0	0	0	0	0	0	0	0	0	0	0	0	0	0	0
Poc_contig_12994	0	0	0	0	0	0	0	0	0	0	0	0	0	0	0	0	0	0	0	0	0	0	0	0	0	0	0	0	0	0	0	0	0	0	0	0	0	0	0	0	0	0	0	0	0	0	0	0	0
Poc_contig_13014	0	0	0	0	0	0	0	0	1	0	0	0	0	0	0	0	0	0	0	0	0	0	0	0	0	0	0	0	0	0	0	0	0.0438645	0	0	0	0	0	0	0	0	0	0	0	0	0	0	0	0
Poc_contig_13034	2	5	7	5	2	2	0	6	4	1	3	10	5	3	9	10	8	5	2	6	8	3	8	8	0.0893806	0.25191	0.333899	0.234709	0.101884	0.0835426	0	0.271628	0.175458	0.0513423	0.135714	0.49893	0.236869	0.146824	0.435511	0.462806	0.3721	0.221587	0.091798	0.300173	0.354486	0.150899	0.393201	0.405517	0.182554
Poc_contig_13155	41	14	22	26	11	11	19	41	36	26	24	26	18	22	44	40	30	22	29	43	34	17	18	18	1.8323	0.705348	1.0494	1.22049	0.560363	0.459484	0.814522	1.85613	1.57912	1.3349	1.08571	1.29722	0.852729	1.07671	2.12916	1.85123	1.39538	0.974982	1.33107	2.15124	1.50657	0.855096	0.884702	0.912412	0.971231
Poc_contig_13165	0	0	0	0	0	0	0	0	0	0	0	0	0	0	0	0	0	0	0	0	0	0	0	0	0	0	0	0	0	0	0	0	0	0	0	0	0	0	0	0	0	0	0	0	0	0	0	0	0
Poc_contig_13227	3	3	5	5	4	2	0	5	0	2	5	3	0	2	6	6	3	4	2	1	2	2	3	1	0.134071	0.151146	0.238499	0.234709	0.203768	0.0835426	0	0.226357	0	0.102685	0.22619	0.149679	0	0.0978828	0.29034	0.277684	0.139538	0.17727	0.091798	0.0500289	0.0886216	0.1006	0.14745	0.0506896	0.174289
Poc_contig_13361	2	0	0	0	0	0	0	0	0	0	0	0	0	0	0	0	2	0	0	0	0	0	0	1	0.0893806	0	0	0	0	0	0	0	0	0	0	0	0	0	0	0	0.093025	0	0	0	0	0	0	0.0506896	0.0148968
Poc_contig_13472	0	0	0	0	0	0	0	0	0	0	0	0	0	0	0	0	0	0	0	0	0	0	0	0	0	0	0	0	0	0	0	0	0	0	0	0	0	0	0	0	0	0	0	0	0	0	0	0	0
Poc_contig_13500	33	15	17	29	18	4	17	44	33	23	32	15	16	20	28	14	21	19	18	25	31	20	16	14	1.47478	0.75573	0.810898	1.36131	0.916958	0.167085	0.728783	1.99194	1.44753	1.18087	1.44761	0.748395	0.757981	0.978828	1.35492	0.647929	0.976763	0.84203	0.826182	1.25072	1.37363	1.006	0.786401	0.709654	0.914461
Poc_contig_13693	29	39	29	30	22	17	17	25	43	14	36	24	21	29	54	31	27	25	31	37	23	25	22	51	1.29602	1.9649	1.3833	1.40826	1.12073	0.710112	0.728783	1.13178	1.88617	0.718793	1.62856	1.19743	0.994851	1.4193	2.61306	1.4347	1.25584	1.10793	1.42287	1.85107	1.01915	1.25749	1.0813	2.58517	1.31388
Poc_contig_13878	3	2	5	2	2	0	4	2	4	1	0	3	7	0	6	3	0	0	1	1	7	4	2	4	0.134071	0.100764	0.238499	0.0938837	0.101884	0	0.171478	0.0905428	0.175458	0.0513423	0	0.149679	0.331617	0	0.29034	0.138842	0	0	0.045899	0.0500289	0.310175	0.201199	0.0983002	0.202758	0.111517
Poc_contig_13932	0	0	0	0	0	0	0	0	0	0	0	0	0	0	0	0	0	0	0	0	0	0	0	0	0	0	0	0	0	0	0	0	0	0	0	0	0	0	0	0	0	0	0	0	0	0	0	0	0
Poc_contig_14060	0	0	0	0	0	0	0	0	0	0	0	0	0	0	0	0	0	0	0	0	0	0	0	0	0	0	0	0	0	0	0	0	0	0	0	0	0	0	0	0	0	0	0	0	0	0	0	0	0
Poc_contig_14120	0	0	0	0	0	0	0	0	0	0	0	0	0	0	0	0	0	0	0	0	0	0	0	0	0	0	0	0	0	0	0	0	0	0	0	0	0	0	0	0	0	0	0	0	0	0	0	0	0
Poc_contig_14128	25	8	17	7	7	2	13	19	15	3	7	9	13	10	10	15	15	9	4	12	13	9	11	18	1.11726	0.403056	0.810898	0.328593	0.356595	0.0835426	0.557304	0.860156	0.657968	0.154027	0.316665	0.449037	0.61586	0.489414	0.483901	0.69421	0.697688	0.398856	0.183596	0.600346	0.57604	0.452698	0.540651	0.912412	0.516657
Poc_contig_14133	37	18	24	17	4	11	12	45	27	12	14	29	14	11	47	14	15	7	26	22	19	11	16	21	1.65354	0.906876	1.1448	0.798012	0.203768	0.459484	0.514435	2.03721	1.18434	0.616108	0.633331	1.4469	0.663234	0.538356	2.27433	0.647929	0.697688	0.310222	1.19337	1.10063	0.841905	0.553298	0.786401	1.06448	0.86108
Poc_contig_1434	5	0	2	3	0	2	0	4	4	0	0	1	0	2	3	0	0	1	1	2	2	3	0	2	0.223451	0	0.0953997	0.140826	0	0.0835426	0	0.181086	0.175458	0	0	0.049893	0	0.0978828	0.14517	0	0	0.0443174	0.045899	0.100058	0.0886216	0.150899	0	0.101379	0.0905366
Poc_contig_1435	4	3	0	2	0	5	0	0	7	0	2	4	1	4	5	0	1	2	3	6	1	0	2	3	0.178761	0.151146	0	0.0938837	0	0.208857	0	0	0.307052	0	0.0904758	0.199572	0.0473738	0.195766	0.24195	0	0.0465125	0.0886348	0.137697	0.300173	0.0443108	0	0.0983002	0.152069	0.105441
Poc_contig_14404	0	1	0	0	0	0	0	0	0	0	0	0	2	1	2	0	0	0	1	1	3	1	0	0	0	0.050382	0	0	0	0	0	0	0	0	0	0	0.0947477	0.0489414	0.0967801	0	0	0	0.045899	0.0500289	0.132932	0.0502998	0	0	0.008397
Poc_contig_14434	0	0	0	0	0	0	0	0	0	0	0	0	0	0	0	0	0	0	0	0	0	0	0	0	0	0	0	0	0	0	0	0	0	0	0	0	0	0	0	0	0	0	0	0	0	0	0	0	0
Poc_contig_14451	31	27	45	39	20	18	8	54	48	24	28	31	19	20	44	15	29	14	15	28	23	15	19	8	1.3854	1.36031	2.14649	1.83073	1.01884	0.751884	0.342957	2.44465	2.1055	1.23222	1.26666	1.54668	0.900103	0.978828	2.12916	0.69421	1.34886	0.620443	0.688485	1.40081	1.01915	0.754497	0.933852	0.405517	1.41561
Poc_contig_1454	0	2	6	2	4	1	1	0	2	4	3	2	1	0	18	4	6	0	6	1	0	3	4	3	0	0.100764	0.286199	0.0938837	0.203768	0.0417713	0.0428696	0	0.087729	0.205369	0.135714	0.099786	0.0473738	0	0.871021	0.185123	0.279075	0	0.275394	0.0500289	0	0.150899	0.1966	0.152069	0.121064
Poc_contig_14637	6	0	5	2	0	0	0	5	11	1	3	1	0	3	3	2	2	6	1	6	4	4	9	2	0.268142	0	0.238499	0.0938837	0	0	0	0.226357	0.48251	0.0513423	0.135714	0.049893	0	0.146824	0.14517	0.0925613	0.093025	0.265904	0.045899	0.300173	0.177243	0.201199	0.442351	0.101379	0.100087
Poc_contig_14771	0	0	0	0	0	0	0	0	0	0	0	0	0	0	0	0	0	0	0	0	0	0	0	0	0	0	0	0	0	0	0	0	0	0	0	0	0	0	0	0	0	0	0	0	0	0	0	0	0
Poc_contig_14818	3	3	2	1	0	1	0	1	2	1	3	0	3	0	3	7	0	0	3	1	2	0	1	0	0.134071	0.151146	0.0953997	0.0469419	0	0.0417713	0	0.0452714	0.087729	0.0513423	0.135714	0	0.142122	0	0.14517	0.323964	0	0	0.137697	0.0500289	0.0886216	0	0.0491501	0	0.0782216
Poc_contig_14966	291	135	285	208	74	134	149	263	354	149	202	209	195	201	324	250	205	138	241	293	246	208	179	162	13.0049	6.80157	13.5945	9.76391	3.76972	5.59736	6.38757	11.9064	15.528	7.65001	9.13806	10.4276	9.2379	9.83722	15.6784	11.5702	9.53507	6.1158	11.0617	14.6585	10.9005	10.4624	8.79787	8.21171	8.75532
Poc_contig_15075	9	11	14	6	3	2	6	13	7	7	13	4	3	8	5	3	4	6	11	4	6	5	2	3	0.402213	0.554202	0.667798	0.281651	0.152826	0.0835426	0.257217	0.588528	0.307052	0.359396	0.588093	0.199572	0.142122	0.391531	0.24195	0.138842	0.18605	0.265904	0.504889	0.200115	0.265865	0.251499	0.0983002	0.152069	0.357039
Poc_contig_15201	0	0	0	0	0	0	0	0	0	0	0	0	0	0	0	0	0	0	0	0	0	0	0	0	0	0	0	0	0	0	0	0	0	0	0	0	0	0	0	0	0	0	0	0	0	0	0	0	0
Poc_contig_15261	0	0	0	0	0	0	0	0	0	0	0	0	0	0	0	0	0	0	0	0	0	0	0	0	0	0	0	0	0	0	0	0	0	0	0	0	0	0	0	0	0	0	0	0	0	0	0	0	0
Poc_contig_15428	0	0	0	0	0	0	0	0	0	0	0	0	0	0	0	0	0	0	0	0	0	0	0	0	0	0	0	0	0	0	0	0	0	0	0	0	0	0	0	0	0	0	0	0	0	0	0	0	0
Poc_contig_15553	5	1	16	10	4	3	8	5	10	3	7	6	12	2	12	11	11	4	6	11	7	3	6	10	0.223451	0.050382	0.763198	0.469419	0.203768	0.125314	0.342957	0.226357	0.438645	0.154027	0.316665	0.299358	0.568486	0.0978828	0.580681	0.509087	0.511638	0.17727	0.275394	0.550317	0.310175	0.150899	0.294901	0.506896	0.305922
Poc_contig_15560	2	4	1	3	0	0	0	0	4	1	0	2	2	0	7	2	0	0	0	0	0	0	0	1	0.0893806	0.201528	0.0476999	0.140826	0	0	0	0	0.175458	0.0513423	0	0.099786	0.0947477	0	0.33873	0.0925613	0	0	0	0	0	0	0	0.0506896	0.0799057
Poc_contig_15738	0	0	0	0	0	0	0	0	0	0	0	0	0	0	0	0	0	0	0	0	0	0	0	0	0	0	0	0	0	0	0	0	0	0	0	0	0	0	0	0	0	0	0	0	0	0	0	0	0
Poc_contig_15750	0	0	0	0	0	0	0	0	0	0	0	0	0	0	0	0	0	0	0	0	0	0	0	0	0	0	0	0	0	0	0	0	0	0	0	0	0	0	0	0	0	0	0	0	0	0	0	0	0
Poc_contig_15788	0	0	1	0	0	0	0	0	0	0	0	0	0	0	0	0	0	0	1	1	0	2	0	0	0	0	0.0476999	0	0	0	0	0	0	0	0	0	0	0	0	0	0	0	0.045899	0.0500289	0	0.1006	0	0	0.00794998
Poc_contig_1601	12	2	1	7	0	0	0	4	6	1	1	5	4	2	1	3	3	2	5	6	5	0	2	2	0.536283	0.100764	0.0476999	0.328593	0	0	0	0.181086	0.263187	0.0513423	0.0452379	0.249465	0.189495	0.0978828	0.0483901	0.138842	0.139538	0.0886348	0.229495	0.300173	0.221554	0	0.0983002	0.101379	0.16889
Poc_contig_16056	4	2	1	2	0	2	2	5	2	0	1	0	3	0	2	1	2	0	2	4	2	0	0	0	0.178761	0.100764	0.0476999	0.0938837	0	0.0835426	0.0857391	0.226357	0.087729	0	0.0452379	0	0.142122	0	0.0967801	0.0462806	0.093025	0	0.091798	0.200115	0.0886216	0	0	0	0.0841086
Poc_contig_16069	39	34	25	49	21	23	18	51	74	21	29	38	38	37	38	59	38	34	37	44	47	23	37	23	1.74292	1.71299	1.1925	2.30015	1.06978	0.96074	0.771652	2.30884	3.24597	1.07819	1.3119	1.89593	1.80021	1.81083	1.83882	2.73056	1.76748	1.50679	1.69826	2.20127	2.08261	1.15689	1.81855	1.16586	1.49651
Poc_contig_16174	0	0	0	0	0	0	0	0	0	0	0	0	0	0	0	0	0	0	0	0	0	0	0	0	0	0	0	0	0	0	0	0	0	0	0	0	0	0	0	0	0	0	0	0	0	0	0	0	0
Poc_contig_1619	6	6	5	5	1	3	1	7	9	1	11	8	6	13	11	10	4	10	9	12	4	3	7	6	0.268142	0.302292	0.238499	0.234709	0.0509421	0.125314	0.0428696	0.3169	0.394781	0.0513423	0.497617	0.399144	0.284243	0.636238	0.532291	0.462806	0.18605	0.443174	0.413091	0.600346	0.177243	0.150899	0.344051	0.304137	0.203316
Poc_contig_1620	3	3	4	5	3	0	2	2	6	1	0	2	4	4	12	2	1	5	6	6	2	1	2	1	0.134071	0.151146	0.190799	0.234709	0.152826	0	0.0857391	0.0905428	0.263187	0.0513423	0	0.099786	0.189495	0.195766	0.580681	0.0925613	0.0465125	0.221587	0.275394	0.300173	0.0886216	0.0502998	0.0983002	0.0506896	0.143925
Poc_contig_16201	263	158	211	192	213	139	175	201	195	164	135	166	144	184	189	187	189	219	137	158	206	143	182	121	11.7535	7.96036	10.0647	9.01284	10.8507	5.80621	7.50218	9.09955	8.55358	8.42014	6.10712	8.28223	6.82183	9.00522	9.14572	8.65448	8.79087	9.70551	6.28816	7.90456	9.12802	7.19287	8.94532	6.13344	9.24138
Poc_contig_16205	0	0	0	0	0	0	0	0	0	0	0	0	0	0	0	0	0	0	0	0	0	0	0	0	0	0	0	0	0	0	0	0	0	0	0	0	0	0	0	0	0	0	0	0	0	0	0	0	0
Poc_contig_16252	48	32	45	38	17	12	26	52	46	18	30	27	24	23	49	31	38	17	58	41	27	37	30	35	2.14513	1.61222	2.14649	1.78379	0.866016	0.501256	1.11461	2.35411	2.01777	0.924162	1.35714	1.34711	1.13697	1.12565	2.37111	1.4347	1.76748	0.753396	2.66214	2.05118	1.19639	1.86109	1.4745	1.77414	1.50915
Poc_contig_16416	2	2	1	0	1	0	0	0	2	1	0	1	0	0	0	1	0	0	3	2	2	0	0	0	0.0893806	0.100764	0.0476999	0	0.0509421	0	0	0	0.087729	0.0513423	0	0.049893	0	0	0	0.0462806	0	0	0.137697	0.100058	0.0886216	0	0	0	0.0481311
Poc_contig_16713	2	3	2	2	0	0	2	6	4	1	0	0	2	0	2	2	2	1	6	0	2	0	4	0	0.0893806	0.151146	0.0953997	0.0938837	0	0	0.0857391	0.271628	0.175458	0.0513423	0	0	0.0947477	0	0.0967801	0.0925613	0.093025	0.0443174	0.275394	0	0.0886216	0	0.1966	0	0.071635
Poc_contig_16722	0	0	0	0	0	0	0	0	0	0	0	0	0	0	0	0	0	0	0	0	0	0	0	0	0	0	0	0	0	0	0	0	0	0	0	0	0	0	0	0	0	0	0	0	0	0	0	0	0
Poc_contig_16792	0	0	0	0	0	0	0	0	0	0	0	0	0	0	0	2	0	0	0	1	0	0	3	0	0	0	0	0	0	0	0	0	0	0	0	0	0	0	0	0.0925613	0	0	0	0.0500289	0	0	0.14745	0	0
Poc_contig_16873	2	0	1	1	0	0	1	1	2	0	0	0	0	1	2	1	0	0	1	0	0	0	0	0	0.0893806	0	0.0476999	0.0469419	0	0	0.0428696	0.0452714	0.087729	0	0	0	0	0.0489414	0.0967801	0.0462806	0	0	0.045899	0	0	0	0	0	0.0306704
Poc_contig_16924	6	5	4	6	0	3	3	1	5	0	2	6	2	1	10	4	12	1	3	0	3	1	3	2	0.268142	0.25191	0.190799	0.281651	0	0.125314	0.128609	0.0452714	0.219323	0	0.0904758	0.299358	0.0947477	0.0489414	0.483901	0.185123	0.55815	0.0443174	0.137697	0	0.132932	0.0502998	0.14745	0.101379	0.186303
Poc_contig_1735	3	4	1	1	3	0	4	3	4	0	3	2	2	2	0	3	1	2	2	7	7	0	2	2	0.134071	0.201528	0.0476999	0.0469419	0.152826	0	0.171478	0.135814	0.175458	0	0.135714	0.099786	0.0947477	0.0978828	0	0.138842	0.0465125	0.0886348	0.091798	0.350202	0.310175	0	0.0983002	0.101379	0.0971778
Poc_contig_17357	11	5	7	21	8	6	6	7	22	5	9	9	8	9	13	19	11	3	6	6	8	4	6	5	0.491593	0.25191	0.333899	0.985779	0.407537	0.250628	0.257217	0.3169	0.96502	0.256712	0.407141	0.449037	0.378991	0.440473	0.629071	0.879332	0.511638	0.132952	0.275394	0.300173	0.354486	0.201199	0.294901	0.253448	0.453558
Poc_contig_17364	0	0	0	0	0	0	0	0	0	0	0	0	0	0	0	0	0	0	0	0	0	0	0	0	0	0	0	0	0	0	0	0	0	0	0	0	0	0	0	0	0	0	0	0	0	0	0	0	0
Poc_contig_17487	0	7	0	0	0	0	0	1	4	0	0	0	1	1	0	0	0	0	0	0	0	0	0	0	0	0.352674	0	0	0	0	0	0.0452714	0.175458	0	0	0	0.0473738	0.0489414	0	0	0	0	0	0	0	0	0	0	0.058779
Poc_contig_18144	0	0	0	0	0	0	0	0	0	0	0	0	0	0	0	0	0	0	0	0	0	0	0	0	0	0	0	0	0	0	0	0	0	0	0	0	0	0	0	0	0	0	0	0	0	0	0	0	0
Poc_contig_18233	0	0	0	0	3	0	0	0	0	0	1	1	0	0	0	0	1	1	1	0	2	0	0	0	0	0	0	0	0.152826	0	0	0	0	0	0.0452379	0.049893	0	0	0	0	0.0465125	0.0443174	0.045899	0	0.0886216	0	0	0	0.0254711
Poc_contig_18493	0	3	0	0	0	0	0	0	0	0	0	0	0	0	0	0	0	0	0	0	1	2	0	0	0	0.151146	0	0	0	0	0	0	0	0	0	0	0	0	0	0	0	0	0	0	0.0443108	0.1006	0	0	0.025191
Poc_contig_18562	26	12	24	23	13	3	7	24	35	15	15	32	18	18	37	23	23	3	16	33	28	17	18	13	1.16195	0.604584	1.1448	1.07966	0.662248	0.125314	0.300087	1.08651	1.53526	0.770135	0.678569	1.59658	0.852729	0.880945	1.79043	1.06445	1.06979	0.132952	0.734384	1.65095	1.2407	0.855096	0.884702	0.658965	0.796426
Poc_contig_18755	4	5	10	6	5	1	5	8	6	4	10	3	4	6	7	2	0	4	5	6	3	5	2	3	0.178761	0.25191	0.476999	0.281651	0.254711	0.0417713	0.214348	0.362171	0.263187	0.205369	0.452379	0.149679	0.189495	0.293648	0.33873	0.0925613	0	0.17727	0.229495	0.300173	0.132932	0.251499	0.0983002	0.152069	0.247634
Poc_contig_18899	0	0	1	2	0	1	0	0	3	2	0	1	2	0	2	0	0	3	3	0	1	1	2	0	0	0	0.0476999	0.0938837	0	0.0417713	0	0	0.131594	0.102685	0	0.049893	0.0947477	0	0.0967801	0	0	0.132952	0.137697	0	0.0443108	0.0502998	0.0983002	0	0.0305592
Poc_contig_18941	0	0	0	0	0	0	0	0	0	0	0	0	0	0	0	0	0	0	0	0	0	0	0	0	0	0	0	0	0	0	0	0	0	0	0	0	0	0	0	0	0	0	0	0	0	0	0	0	0
Poc_contig_19055	0	0	0	0	0	1	1	0	0	0	1	0	0	1	0	0	0	0	0	1	0	1	0	0	0	0	0	0	0	0.0417713	0.0428696	0	0	0	0.0452379	0	0	0.0489414	0	0	0	0	0	0.0500289	0	0.0502998	0	0	0.00696189
Poc_contig_192	5	1	1	1	2	2	2	6	3	3	7	9	5	5	2	2	4	5	3	7	3	5	6	4	0.223451	0.050382	0.0476999	0.0469419	0.101884	0.0835426	0.0857391	0.271628	0.131594	0.154027	0.316665	0.449037	0.236869	0.244707	0.0967801	0.0925613	0.18605	0.221587	0.137697	0.350202	0.132932	0.251499	0.294901	0.202758	0.092317
Poc_contig_1941	0	0	0	0	0	0	0	0	0	0	0	0	0	0	0	0	0	0	0	0	0	0	0	0	0	0	0	0	0	0	0	0	0	0	0	0	0	0	0	0	0	0	0	0	0	0	0	0	0
Poc_contig_19654	1	0	1	0	0	0	2	1	2	0	1	0	0	0	0	0	1	0	0	0	0	0	0	1	0.0446903	0	0.0476999	0	0	0	0.0857391	0.0452714	0.087729	0	0.0452379	0	0	0	0	0	0.0465125	0	0	0	0	0	0	0.0506896	0.0153984
Poc_contig_2171	9	12	14	7	5	7	16	9	15	4	2	11	10	4	11	15	19	4	16	13	13	14	6	9	0.402213	0.604584	0.667798	0.328593	0.254711	0.292399	0.685913	0.407442	0.657968	0.205369	0.0904758	0.548823	0.473738	0.195766	0.532291	0.69421	0.883738	0.17727	0.734384	0.650375	0.57604	0.704197	0.294901	0.456206	0.42505
Poc_contig_276	13	24	13	10	13	2	16	12	14	7	17	15	14	4	15	22	17	8	14	33	21	14	16	19	0.580974	1.20917	0.620098	0.469419	0.662248	0.0835426	0.685913	0.543257	0.614103	0.359396	0.769044	0.748395	0.663234	0.195766	0.725851	1.01817	0.790713	0.354539	0.642586	1.65095	0.930526	0.704197	0.786401	0.963102	0.604242
Poc_contig_2856	68	38	52	44	19	7	79	127	53	24	36	26	27	28	84	39	52	41	59	64	61	29	53	53	3.03894	1.91452	2.48039	2.06544	0.9679	0.292399	3.3867	5.74947	2.32482	1.23222	1.62856	1.29722	1.27909	1.37036	4.06477	1.80494	2.41865	1.81701	2.70804	3.20185	2.70296	1.45869	2.60495	2.68655	1.79327
Poc_contig_2925	49	26	42	36	19	18	23	41	74	33	31	27	26	22	56	40	36	19	29	70	43	29	36	28	2.18982	1.30993	2.00339	1.68991	0.9679	0.751884	0.986	1.85613	3.24597	1.6943	1.40237	1.34711	1.23172	1.07671	2.70984	1.85123	1.67445	0.84203	1.33107	3.50202	1.90536	1.45869	1.7694	1.41931	1.48547
Poc_contig_2997	2	6	0	2	0	3	2	2	3	4	2	3	2	0	2	2	0	1	1	5	0	1	2	0	0.0893806	0.302292	0	0.0938837	0	0.125314	0.0857391	0.0905428	0.131594	0.205369	0.0904758	0.149679	0.0947477	0	0.0967801	0.0925613	0	0.0443174	0.045899	0.250144	0	0.0502998	0.0983002	0	0.101812
Poc_contig_3006	9	12	6	8	2	7	9	8	26	10	10	7	12	6	15	11	14	3	4	17	6	12	4	8	0.402213	0.604584	0.286199	0.375535	0.101884	0.292399	0.385826	0.362171	1.14048	0.513423	0.452379	0.349251	0.568486	0.293648	0.725851	0.509087	0.651175	0.132952	0.183596	0.850491	0.265865	0.603597	0.1966	0.405517	0.343802
Poc_contig_3029	111	96	88	99	37	59	101	140	189	70	71	132	86	125	181	169	108	97	112	88	146	75	101	80	4.96062	4.83667	4.19759	4.64724	1.88486	2.46451	4.32983	6.33799	8.2904	3.59396	3.21189	6.58587	4.07415	6.11768	8.7586	7.82143	5.02335	4.29879	5.14069	4.40254	6.46937	3.77248	4.96416	4.05517	3.83192
Poc_contig_3123	0	0	0	0	0	0	0	0	0	0	0	0	0	0	0	0	0	0	0	0	0	0	0	0	0	0	0	0	0	0	0	0	0	0	0	0	0	0	0	0	0	0	0	0	0	0	0	0	0
Poc_contig_3209	0	2	2	1	1	5	1	3	7	5	2	4	0	1	3	4	2	0	2	7	2	3	3	0	0	0.100764	0.0953997	0.0469419	0.0509421	0.208857	0.0428696	0.135814	0.307052	0.256712	0.0904758	0.199572	0	0.0489414	0.14517	0.185123	0.093025	0	0.091798	0.350202	0.0886216	0.150899	0.14745	0	0.0838174
Poc_contig_3356	80	54	69	32	33	27	77	102	97	55	28	52	36	20	49	41	59	10	43	44	26	33	20	56	3.57522	2.72063	3.29129	1.50214	1.68109	1.12783	3.30096	4.61768	4.25486	2.82383	1.26666	2.59443	1.70546	0.978828	2.37111	1.89751	2.74424	0.443174	1.97366	2.20127	1.15208	1.65989	0.983002	2.83862	2.31637
Poc_contig_3385	23	6	14	11	8	6	13	14	22	11	12	14	16	17	20	19	15	14	15	17	11	13	21	13	1.02788	0.302292	0.667798	0.516361	0.407537	0.250628	0.557304	0.633799	0.96502	0.564766	0.542855	0.698502	0.757981	0.832004	0.967801	0.879332	0.697688	0.620443	0.688485	0.850491	0.487419	0.653897	1.03215	0.658965	0.528749
Poc_contig_3616	39	54	32	39	18	20	24	47	52	17	38	36	22	29	61	20	42	15	30	45	21	31	42	57	1.74292	2.72063	1.5264	1.83073	0.916958	0.835426	1.02887	2.12775	2.28096	0.87282	1.71904	1.79615	1.04222	1.4193	2.95179	0.925613	1.95353	0.664761	1.37697	2.2513	0.930526	1.55929	2.0643	2.88931	1.59551
Poc_contig_3632	0	0	3	4	1	0	3	1	5	3	0	1	0	1	3	0	0	0	2	0	0	0	1	1	0	0	0.1431	0.187767	0.0509421	0	0.128609	0.0452714	0.219323	0.154027	0	0.049893	0	0.0489414	0.14517	0	0	0	0.091798	0	0	0	0.0491501	0.0506896	0.0636349
Poc_contig_3783	11	11	1	4	1	7	4	23	13	2	17	7	1	7	27	5	4	6	22	7	2	10	4	3	0.491593	0.554202	0.0476999	0.187767	0.0509421	0.292399	0.171478	1.04124	0.570239	0.102685	0.769044	0.349251	0.0473738	0.34259	1.30653	0.231403	0.18605	0.265904	1.00978	0.350202	0.0886216	0.502998	0.1966	0.152069	0.270767
Poc_contig_3823	7	9	17	7	2	1	9	20	12	6	8	6	11	5	8	10	7	2	4	12	5	7	7	6	0.312832	0.453438	0.810898	0.328593	0.101884	0.0417713	0.385826	0.905428	0.526374	0.308054	0.361903	0.299358	0.521112	0.244707	0.387121	0.462806	0.325588	0.0886348	0.183596	0.600346	0.221554	0.352098	0.344051	0.304137	0.341569
Poc_contig_3943	0	0	0	0	0	0	0	0	0	0	0	0	0	0	0	0	0	0	0	0	0	0	0	0	0	0	0	0	0	0	0	0	0	0	0	0	0	0	0	0	0	0	0	0	0	0	0	0	0
Poc_contig_3949	0	0	0	0	0	0	0	0	0	0	0	0	0	0	0	0	0	0	0	0	0	0	0	0	0	0	0	0	0	0	0	0	0	0	0	0	0	0	0	0	0	0	0	0	0	0	0	0	0
Poc_contig_4085	0	2	1	1	1	1	0	0	1	2	0	2	4	0	1	1	2	1	1	0	1	1	0	0	0	0.100764	0.0476999	0.0469419	0.0509421	0.0417713	0	0	0.0438645	0.102685	0	0.099786	0.189495	0	0.0483901	0.0462806	0.093025	0.0443174	0.045899	0	0.0443108	0.0502998	0	0	0.0480199
Poc_contig_4341	0	17	4	2	11	6	1	5	11	9	8	16	4	15	16	23	7	4	11	18	7	10	8	7	0	0.856494	0.190799	0.0938837	0.560363	0.250628	0.0428696	0.226357	0.48251	0.462081	0.361903	0.798288	0.189495	0.734121	0.774241	1.06445	0.325588	0.17727	0.504889	0.900519	0.310175	0.502998	0.393201	0.354827	0.325361
Poc_contig_4522	7	30	6	17	36	42	19	9	29	23	6	20	12	31	14	62	24	25	10	156	44	8	35	12	0.312832	1.51146	0.286199	0.798012	1.83392	1.7544	0.814522	0.407442	1.27207	1.18087	0.271427	0.99786	0.568486	1.51718	0.677461	2.8694	1.1163	1.10793	0.45899	7.8045	1.94967	0.402398	1.72025	0.608275	1.0828
Poc_contig_4694	61	41	28	55	9	25	65	67	26	18	71	25	20	14	14	33	21	28	47	38	31	20	20	15	2.72611	2.06566	1.3356	2.5818	0.458479	1.04428	2.78652	3.03318	1.14048	0.924162	3.21189	1.24732	0.947477	0.68518	0.677461	1.52726	0.976763	1.24089	2.15725	1.9011	1.37363	1.006	0.983002	0.760344	1.70199
Poc_contig_4700	7	2	10	10	4	2	4	8	2	10	3	3	1	3	4	3	4	0	0	3	3	3	3	7	0.312832	0.100764	0.476999	0.469419	0.203768	0.0835426	0.171478	0.362171	0.087729	0.513423	0.135714	0.149679	0.0473738	0.146824	0.19356	0.138842	0.18605	0	0	0.150087	0.132932	0.150899	0.14745	0.354827	0.274554
Poc_contig_4720	0	9	1	1	3	4	6	3	6	5	9	5	4	2	5	6	5	2	5	6	3	0	5	2	0	0.453438	0.0476999	0.0469419	0.152826	0.167085	0.257217	0.135814	0.263187	0.256712	0.407141	0.249465	0.189495	0.0978828	0.24195	0.277684	0.232563	0.0886348	0.229495	0.300173	0.132932	0	0.24575	0.101379	0.144665
Poc_contig_4838	7	6	21	9	8	6	2	14	4	7	5	8	5	10	21	12	11	18	9	20	9	11	10	7	0.312832	0.302292	1.0017	0.422477	0.407537	0.250628	0.0857391	0.633799	0.175458	0.359396	0.22619	0.399144	0.236869	0.489414	1.01619	0.555368	0.511638	0.797713	0.413091	1.00058	0.398797	0.553298	0.491501	0.354827	0.449577
Poc_contig_492	3	3	1	2	0	1	0	5	0	3	1	0	0	1	1	2	0	1	3	11	2	1	1	3	0.134071	0.151146	0.0476999	0.0938837	0	0.0417713	0	0.226357	0	0.154027	0.0452379	0	0	0.0489414	0.0483901	0.0925613	0	0.0443174	0.137697	0.550317	0.0886216	0.0502998	0.0491501	0.152069	0.0780953
Poc_contig_5076	8	5	11	11	3	7	6	6	17	7	4	14	4	5	12	13	9	7	3	10	5	12	10	6	0.357522	0.25191	0.524699	0.516361	0.152826	0.292399	0.257217	0.271628	0.745697	0.359396	0.180952	0.698502	0.189495	0.244707	0.580681	0.601648	0.418613	0.310222	0.137697	0.500289	0.221554	0.603597	0.491501	0.304137	0.349286
Poc_contig_5284	0	0	0	0	0	0	0	0	0	0	0	0	0	0	0	0	0	0	0	0	0	0	0	0	0	0	0	0	0	0	0	0	0	0	0	0	0	0	0	0	0	0	0	0	0	0	0	0	0
Poc_contig_5351	0	0	0	0	0	0	0	0	0	0	0	0	0	0	0	0	0	0	0	0	0	0	0	0	0	0	0	0	0	0	0	0	0	0	0	0	0	0	0	0	0	0	0	0	0	0	0	0	0
Poc_contig_5549	5	1	7	3	0	0	3	1	4	0	0	0	0	1	2	2	3	1	2	6	4	2	2	5	0.223451	0.050382	0.333899	0.140826	0	0	0.128609	0.0452714	0.175458	0	0	0	0	0.0489414	0.0967801	0.0925613	0.139538	0.0443174	0.091798	0.300173	0.177243	0.1006	0.0983002	0.253448	0.12476
Poc_contig_5573	81	57	65	70	38	39	56	86	80	49	57	73	56	69	81	82	73	49	72	59	68	47	49	47	3.61991	2.87178	3.10049	3.28593	1.9358	1.62908	2.4007	3.89334	3.50916	2.51577	2.57856	3.64219	2.65293	3.37696	3.9196	3.79501	3.39541	2.17155	3.30473	2.9517	3.01313	2.36409	2.40835	2.38241	2.7405
Poc_contig_5798	0	0	0	0	0	0	0	0	0	0	0	0	0	0	0	0	0	0	0	0	0	0	0	0	0	0	0	0	0	0	0	0	0	0	0	0	0	0	0	0	0	0	0	0	0	0	0	0	0
Poc_contig_5892	4	2	2	2	1	0	1	3	8	1	10	5	8	4	4	5	7	1	5	5	2	3	3	3	0.178761	0.100764	0.0953997	0.0938837	0.0509421	0	0.0428696	0.135814	0.350916	0.0513423	0.452379	0.249465	0.378991	0.195766	0.19356	0.231403	0.325588	0.0443174	0.229495	0.250144	0.0886216	0.150899	0.14745	0.152069	0.0866251
Poc_contig_597	0	0	0	0	0	0	0	0	0	0	0	0	0	0	0	0	0	0	0	0	0	0	0	0	0	0	0	0	0	0	0	0	0	0	0	0	0	0	0	0	0	0	0	0	0	0	0	0	0
Poc_contig_5995	0	0	0	0	0	0	0	0	0	0	0	0	0	0	0	0	0	0	0	0	0	0	0	0	0	0	0	0	0	0	0	0	0	0	0	0	0	0	0	0	0	0	0	0	0	0	0	0	0
Poc_contig_6277	6	2	2	1	0	1	1	1	2	1	2	0	2	4	1	1	2	0	3	6	2	2	4	3	0.268142	0.100764	0.0953997	0.0469419	0	0.0417713	0.0428696	0.0452714	0.087729	0.0513423	0.0904758	0	0.0947477	0.195766	0.0483901	0.0462806	0.093025	0	0.137697	0.300173	0.0886216	0.1006	0.1966	0.152069	0.0921698
Poc_contig_6317	1	2	7	6	1	2	0	2	5	1	0	4	2	0	1	4	0	0	5	3	2	6	0	0	0.0446903	0.100764	0.333899	0.281651	0.0509421	0.0835426	0	0.0905428	0.219323	0.0513423	0	0.199572	0.0947477	0	0.0483901	0.185123	0	0	0.229495	0.150087	0.0886216	0.301799	0	0	0.149248
Poc_contig_6360	12	10	7	16	4	8	7	9	16	6	8	12	4	10	11	17	17	5	10	17	13	11	9	10	0.536283	0.50382	0.333899	0.75107	0.203768	0.33417	0.300087	0.407442	0.701832	0.308054	0.361903	0.598716	0.189495	0.489414	0.532291	0.786771	0.790713	0.221587	0.45899	0.850491	0.57604	0.553298	0.442351	0.506896	0.443835
Poc_contig_6375	0	0	0	0	0	0	0	0	0	0	0	0	0	0	0	0	0	0	0	0	0	0	0	0	0	0	0	0	0	0	0	0	0	0	0	0	0	0	0	0	0	0	0	0	0	0	0	0	0
Poc_contig_6432	6	3	7	8	2	1	1	10	9	3	5	8	3	3	3	2	5	1	4	5	4	3	1	4	0.268142	0.151146	0.333899	0.375535	0.101884	0.0417713	0.0428696	0.452714	0.394781	0.154027	0.22619	0.399144	0.142122	0.146824	0.14517	0.0925613	0.232563	0.0443174	0.183596	0.250144	0.177243	0.150899	0.0491501	0.202758	0.212063
Poc_contig_6564	1	3	1	1	1	1	0	3	1	0	0	1	1	3	0	1	0	3	1	1	0	0	1	1	0.0446903	0.151146	0.0476999	0.0469419	0.0509421	0.0417713	0	0.135814	0.0438645	0	0	0.049893	0.0473738	0.146824	0	0.0462806	0	0.132952	0.045899	0.0500289	0	0	0.0491501	0.0506896	0.0638653
Poc_contig_6648	39	31	31	23	12	19	43	29	41	18	31	25	25	16	31	22	29	10	22	48	22	40	19	20	1.74292	1.56184	1.4787	1.07966	0.611305	0.793655	1.84339	1.31287	1.79845	0.924162	1.40237	1.24732	1.18435	0.783063	1.50009	1.01817	1.34886	0.443174	1.00978	2.40139	0.974837	2.01199	0.933852	1.01379	1.21135
Poc_contig_6710	17	7	2	10	6	3	8	8	13	2	2	9	8	4	17	9	6	10	2	4	2	5	5	8	0.759735	0.352674	0.0953997	0.469419	0.305653	0.125314	0.342957	0.362171	0.570239	0.102685	0.0904758	0.449037	0.378991	0.195766	0.822631	0.416526	0.279075	0.443174	0.091798	0.200115	0.0886216	0.251499	0.24575	0.405517	0.351366
Poc_contig_6769	18	10	19	26	7	12	2	24	25	14	21	19	18	17	28	16	9	12	9	22	12	27	13	21	0.804425	0.50382	0.906298	1.22049	0.356595	0.501256	0.0857391	1.08651	1.09661	0.718793	0.949996	0.947967	0.852729	0.832004	1.35492	0.74049	0.418613	0.531809	0.413091	1.10063	0.531729	1.35809	0.638951	1.06448	0.71548
Poc_contig_6783	135	83	118	117	64	50	67	150	163	45	109	93	60	85	122	83	70	84	97	112	119	99	116	143	6.03319	4.18171	5.62859	5.4922	3.2603	2.08857	2.87226	6.79071	7.14992	2.3104	4.93093	4.64005	2.84243	4.16002	5.90359	3.84129	3.25588	3.72266	4.4522	5.60323	5.27298	4.97968	5.70141	7.24861	4.44742
Poc_contig_6986	3	2	4	0	2	3	1	4	7	3	2	1	2	2	3	0	3	0	3	3	1	3	2	1	0.134071	0.100764	0.190799	0	0.101884	0.125314	0.0428696	0.181086	0.307052	0.154027	0.0904758	0.049893	0.0947477	0.0978828	0.14517	0	0.139538	0	0.137697	0.150087	0.0443108	0.150899	0.0983002	0.0506896	0.108805
Poc_contig_70	3	17	0	0	1	2	1	2	3	5	0	1	4	3	2	4	3	2	0	19	1	2	1	0	0.134071	0.856494	0	0	0.0509421	0.0835426	0.0428696	0.0905428	0.131594	0.256712	0	0.049893	0.189495	0.146824	0.0967801	0.185123	0.139538	0.0886348	0	0.950548	0.0443108	0.1006	0.0491501	0	0.187508
Poc_contig_7007	0	0	0	0	0	0	0	0	0	0	0	0	0	0	0	0	0	0	0	0	0	0	0	0	0	0	0	0	0	0	0	0	0	0	0	0	0	0	0	0	0	0	0	0	0	0	0	0	0
Poc_contig_7038	0	0	0	0	0	0	0	0	0	0	0	0	0	0	0	0	0	0	0	0	0	0	0	0	0	0	0	0	0	0	0	0	0	0	0	0	0	0	0	0	0	0	0	0	0	0	0	0	0
Poc_contig_7094	23	13	16	24	8	14	14	24	22	12	24	11	4	13	22	7	12	2	7	12	22	15	7	19	1.02788	0.654966	0.763198	1.1266	0.407537	0.584798	0.600174	1.08651	0.96502	0.616108	1.08571	0.548823	0.189495	0.636238	1.06458	0.323964	0.55815	0.0886348	0.321293	0.600346	0.974837	0.754497	0.344051	0.963102	0.76083
Poc_contig_7238	0	0	0	0	0	0	0	0	0	0	0	0	0	0	0	0	0	0	0	0	0	0	0	0	0	0	0	0	0	0	0	0	0	0	0	0	0	0	0	0	0	0	0	0	0	0	0	0	0
Poc_contig_7249	0	0	0	0	0	0	0	0	0	0	0	0	0	0	0	0	0	0	0	0	0	0	0	0	0	0	0	0	0	0	0	0	0	0	0	0	0	0	0	0	0	0	0	0	0	0	0	0	0
Poc_contig_7279	0	0	0	0	0	0	0	0	0	0	0	0	0	0	0	0	0	0	0	0	0	0	0	0	0	0	0	0	0	0	0	0	0	0	0	0	0	0	0	0	0	0	0	0	0	0	0	0	0
Poc_contig_7471	0	0	0	0	0	0	0	0	0	0	0	0	0	0	0	0	0	0	0	0	0	0	0	0	0	0	0	0	0	0	0	0	0	0	0	0	0	0	0	0	0	0	0	0	0	0	0	0	0
Poc_contig_7634	2	4	0	3	4	10	1	2	6	4	2	0	10	7	0	13	2	2	2	11	15	2	7	0	0.0893806	0.201528	0	0.140826	0.203768	0.417713	0.0428696	0.0905428	0.263187	0.205369	0.0904758	0	0.473738	0.34259	0	0.601648	0.093025	0.0886348	0.091798	0.550317	0.664662	0.1006	0.344051	0	0.175536
Poc_contig_7641	78	62	59	60	32	27	56	73	82	50	50	70	48	51	115	80	51	48	57	92	78	63	55	56	3.48584	3.12369	2.81429	2.81651	1.63015	1.12783	2.4007	3.30481	3.59689	2.56712	2.2619	3.49251	2.27394	2.49601	5.56486	3.70245	2.37214	2.12723	2.61624	4.60265	3.45624	3.16889	2.70325	2.83862	2.49972
Poc_contig_7668	0	0	0	0	0	0	0	0	0	0	0	0	0	0	0	0	0	0	0	0	0	0	0	0	0	0	0	0	0	0	0	0	0	0	0	0	0	0	0	0	0	0	0	0	0	0	0	0	0
Poc_contig_7776	0	0	0	0	0	0	0	0	0	0	0	0	0	0	0	0	0	0	0	0	0	0	0	0	0	0	0	0	0	0	0	0	0	0	0	0	0	0	0	0	0	0	0	0	0	0	0	0	0
Poc_contig_8061	9	4	7	8	7	1	2	10	7	2	3	7	6	6	6	6	2	3	5	15	7	3	11	4	0.402213	0.201528	0.333899	0.375535	0.356595	0.0417713	0.0857391	0.452714	0.307052	0.102685	0.135714	0.349251	0.284243	0.293648	0.29034	0.277684	0.093025	0.132952	0.229495	0.750433	0.310175	0.150899	0.540651	0.202758	0.285257
Poc_contig_8090	0	0	0	0	0	0	0	0	0	0	0	0	0	0	0	0	0	0	0	0	0	0	0	0	0	0	0	0	0	0	0	0	0	0	0	0	0	0	0	0	0	0	0	0	0	0	0	0	0
Poc_contig_8121	0	0	0	0	0	0	0	0	0	0	0	0	0	0	0	0	0	0	0	0	0	0	0	0	0	0	0	0	0	0	0	0	0	0	0	0	0	0	0	0	0	0	0	0	0	0	0	0	0
Poc_contig_8221	0	0	0	0	0	0	0	0	0	0	0	0	0	0	0	0	0	0	0	0	0	0	0	0	0	0	0	0	0	0	0	0	0	0	0	0	0	0	0	0	0	0	0	0	0	0	0	0	0
Poc_contig_8348	2	1	5	4	2	2	1	1	1	0	4	9	3	7	5	3	1	1	6	3	9	4	3	1	0.0893806	0.050382	0.238499	0.187767	0.101884	0.0835426	0.0428696	0.0452714	0.0438645	0	0.180952	0.449037	0.142122	0.34259	0.24195	0.138842	0.0465125	0.0443174	0.275394	0.150087	0.398797	0.201199	0.14745	0.0506896	0.125243
Poc_contig_8429	1	0	2	2	3	4	3	2	4	1	4	4	5	1	3	1	2	5	2	5	1	0	2	0	0.0446903	0	0.0953997	0.0938837	0.152826	0.167085	0.128609	0.0905428	0.175458	0.0513423	0.180952	0.199572	0.236869	0.0489414	0.14517	0.0462806	0.093025	0.221587	0.091798	0.250144	0.0443108	0	0.0983002	0	0.0923142
Poc_contig_8470	1	6	2	0	0	2	0	3	7	0	0	2	1	0	5	2	0	2	2	3	0	4	0	0	0.0446903	0.302292	0.0953997	0	0	0.0835426	0	0.135814	0.307052	0	0	0.099786	0.0473738	0	0.24195	0.0925613	0	0.0886348	0.091798	0.150087	0	0.201199	0	0	0.0876541
Poc_contig_8574	18	14	20	18	8	9	6	16	18	15	14	18	17	20	12	25	13	5	11	25	18	8	6	10	0.804425	0.705348	0.953997	0.844954	0.407537	0.375942	0.257217	0.724342	0.789561	0.770135	0.633331	0.898074	0.805355	0.978828	0.580681	1.15702	0.604663	0.221587	0.504889	1.25072	0.797594	0.402398	0.294901	0.506896	0.682034
Poc_contig_8623	22	4	11	15	1	8	3	8	13	7	9	10	9	7	9	12	10	3	4	12	7	7	6	8	0.983186	0.201528	0.524699	0.704128	0.0509421	0.33417	0.128609	0.362171	0.570239	0.359396	0.407141	0.49893	0.426365	0.34259	0.435511	0.555368	0.465125	0.132952	0.183596	0.600346	0.310175	0.352098	0.294901	0.405517	0.466442
Poc_contig_8762	0	0	0	0	0	0	0	1	0	0	0	0	0	0	0	0	0	0	0	1	2	0	4	0	0	0	0	0	0	0	0	0.0452714	0	0	0	0	0	0	0	0	0	0	0	0.0500289	0.0886216	0	0.1966	0	0
Poc_contig_8799	3	2	2	5	1	5	2	6	4	2	0	3	1	0	1	4	1	0	5	12	3	4	4	0	0.134071	0.100764	0.0953997	0.234709	0.0509421	0.208857	0.0857391	0.271628	0.175458	0.102685	0	0.149679	0.0473738	0	0.0483901	0.185123	0.0465125	0	0.229495	0.600346	0.132932	0.201199	0.1966	0	0.137457
Poc_contig_8879	0	0	0	0	0	0	0	0	0	0	0	0	0	0	0	0	0	0	0	0	0	0	0	0	0	0	0	0	0	0	0	0	0	0	0	0	0	0	0	0	0	0	0	0	0	0	0	0	0
Poc_contig_9075	4	3	4	8	0	6	3	3	7	1	3	4	2	2	3	3	7	1	2	8	2	3	8	3	0.178761	0.151146	0.190799	0.375535	0	0.250628	0.128609	0.135814	0.307052	0.0513423	0.135714	0.199572	0.0947477	0.0978828	0.14517	0.138842	0.325588	0.0443174	0.091798	0.400231	0.0886216	0.150899	0.393201	0.152069	0.191145
Poc_contig_9133	10	10	6	4	8	5	1	7	13	2	7	7	6	6	8	6	8	5	2	12	6	2	6	7	0.446903	0.50382	0.286199	0.187767	0.407537	0.208857	0.0428696	0.3169	0.570239	0.102685	0.316665	0.349251	0.284243	0.293648	0.387121	0.277684	0.3721	0.221587	0.091798	0.600346	0.265865	0.1006	0.294901	0.354827	0.340181
Poc_contig_9177	4	4	3	0	0	2	1	2	10	6	3	1	0	2	5	2	2	0	1	1	4	2	1	2	0.178761	0.201528	0.1431	0	0	0.0835426	0.0428696	0.0905428	0.438645	0.308054	0.135714	0.049893	0	0.0978828	0.24195	0.0925613	0.093025	0	0.045899	0.0500289	0.177243	0.1006	0.0491501	0.101379	0.101155
Poc_contig_9662	0	0	0	0	0	0	0	0	0	0	0	0	0	0	0	0	0	0	0	0	0	0	0	0	0	0	0	0	0	0	0	0	0	0	0	0	0	0	0	0	0	0	0	0	0	0	0	0	0
Poc_contig_9841	0	0	0	0	0	0	1	0	0	0	0	0	0	0	0	0	0	0	0	0	1	0	1	0	0	0	0	0	0	0	0.0428696	0	0	0	0	0	0	0	0	0	0	0	0	0	0.0443108	0	0.0491501	0	0
Poc_contig_9886	0	0	0	0	0	0	0	0	0	0	0	0	0	0	0	0	0	0	0	0	0	0	0	0	0	0	0	0	0	0	0	0	0	0	0	0	0	0	0	0	0	0	0	0	0	0	0	0	0
Poc_contig_9989	0	0	0	0	0	0	0	0	0	0	0	0	0	0	0	0	0	0	0	0	0	0	0	0	0	0	0	0	0	0	0	0	0	0	0	0	0	0	0	0	0	0	0	0	0	0	0	0	0
[truncated: 38 more columns]
